# Supplementary material for: On the accuracy of DFT-SAPT, MP2, SCS-MP2, MP2C, and DFT+Disp methods for the interaction energies of endohedral complexes of the C60fullerene with a rare gas atom
Source: Royal Society of Chemistry journal article supplement (doi:10.1039/c0cp00968g), 2010-11-03
Supplement: c0cp00968g.pdf [file c0cp00968g.pdf]

**On the accuracy of DFT-SAPT, MP2, SCS-MP2, MP2C,  
and DFT+Disp methods for the interaction energies of  
endohedral complexes of the C<sub>60</sub> fullerene with a rare gas  
atom. Supplementary material.**

Andreas Hesselmann\*

*Institut für Physikalische und Theoretische Chemie,  
Universität Erlangen, Egerlandstraße 3, 91058 Erlangen, Germany*

Tatiana Korona<sup>†</sup>

*Faculty of Chemistry, University of Warsaw,  
Pasteura 1, 02-093 Warsaw, Poland*

---

\*Electronic address: [andreas.hesselmann@chemie.uni-erlangen.de](mailto:andreas.hesselmann@chemie.uni-erlangen.de)

<sup>†</sup>Electronic address: [tatiana.korona@chem.uw.edu.pl](mailto:tatiana.korona@chem.uw.edu.pl)

TABLE I: Components of the DFT-SAPT interaction energy for the He@C<sub>60</sub> complex. The total DFT-SAPT energy, as well as MP2, SCS-MP2, DFT+Disp, and MP2C interaction energies are also given. Energy values in kJ/mol, distances in Å. Note that for distances  $r > 3.5$  Å the complex is *exo*hedral.

| $r$ | $E_{\text{elst}}^{(1)}$ | $E_{\text{exch}}^{(1)}$ | $E_{\text{ind}}^{(2)}$ | $E_{\text{exch-ind}}^{(2)}$ | $E_{\text{disp}}^{(2)}$ | $E_{\text{exch-disp}}^{(2)}$ | $\delta E_{\text{HF}}$ | $E_{\text{int}}^{\text{SAPT}}$ | $E_{\text{int}}^{\text{MP2}}$ | $E_{\text{int}}^{\text{SCS-MP2}}$ | $E_{\text{int}}^{\text{DFT+Disp}}$ | $E_{\text{int}}^{\text{MP2C}}$ |
|-----|-------------------------|-------------------------|------------------------|-----------------------------|-------------------------|------------------------------|------------------------|--------------------------------|-------------------------------|-----------------------------------|------------------------------------|--------------------------------|
| 0.0 | -1.17                   | 5.10                    | -0.31                  | 0.32                        | -10.75                  | 0.45                         | -0.25                  | -6.61                          | -8.77                         | -6.07                             | -8.51                              | -7.07                          |
| 0.2 | -1.24                   | 5.40                    | -0.35                  | 0.36                        | -10.64                  | 0.47                         | -0.28                  | -6.28                          | -8.66                         | -5.92                             | -                                  | -7.09                          |
| 0.4 | -1.62                   | 7.04                    | -0.48                  | 0.49                        | -11.49                  | 0.59                         | -0.39                  | -5.86                          | -8.24                         | -5.36                             | -7.91                              | -5.75                          |
| 0.6 | -2.41                   | 10.29                   | -0.77                  | 0.78                        | -12.73                  | 0.81                         | -0.62                  | -4.66                          | -7.20                         | -4.09                             | -                                  | -4.61                          |
| 0.8 | -3.89                   | 16.29                   | -1.37                  | 1.37                        | -14.78                  | 1.18                         | -1.10                  | -2.30                          | -4.90                         | -1.44                             | -5.32                              | -                              |
| 1.0 | -6.69                   | 27.34                   | -2.64                  | 2.61                        | -17.83                  | 1.78                         | -2.04                  | 2.53                           | -0.11                         | 3.82                              | -                                  | 2.82                           |
| 1.2 | -11.83                  | 47.18                   | -5.26                  | 5.13                        | -21.95                  | 2.65                         | -3.81                  | 12.10                          | 9.37                          | 13.94                             | 7.58                               | 12.68                          |
| 1.4 | -21.04                  | 82.25                   | -10.66                 | 10.12                       | -27.68                  | 3.92                         | -6.88                  | 30.02                          | 27.34                         | 32.75                             | -                                  | 31.21                          |
| 2.0 | -106.22                 | 400.44                  | -78.07                 | 58.89                       | -60.48                  | 10.69                        | -17.77                 | 207.49                         | 207.10                        | 216.77                            | -                                  | -                              |
| 5.0 | -26.30                  | 112.39                  | -16.59                 | 15.03                       | -22.17                  | 3.57                         | -8.91                  | 57.01                          | 56.52                         | 59.88                             | -                                  | -                              |
| 6.0 | -1.32                   | 6.37                    | -0.52                  | 0.56                        | -4.07                   | 0.28                         | -0.65                  | 0.65                           | 0.40                          | 1.24                              | -                                  | 1.17                           |
| 7.0 | -0.06                   | 0.31                    | -0.02                  | 0.02                        | -0.85                   | 0.01                         | -0.03                  | -0.62                          | -0.75                         | -0.54                             | -                                  | -0.22                          |
| 8.0 | 0.00                    | 0.01                    | 0.00                   | 0.00                        | -0.24                   | 0.00                         | 0.00                   | -0.23                          | -0.28                         | -0.21                             | -                                  | -0.09                          |
| 9.0 | 0.00                    | 0.00                    | 0.00                   | 0.00                        | -0.09                   | 0.00                         | 0.00                   | -0.09                          | -0.11                         | -0.08                             | -                                  | -0.03                          |

TABLE II: Components of the DFT-SAPT interaction energy for the Ne@C<sub>60</sub> complex. The total DFT-SAPT energy, as well as MP2, SCS-MP2, DFT+Disp, and MP2C interaction energies are also given. Energy values in kJ/mol, distances in Å.

| $r$ | $E_{\text{elst}}^{(1)}$ | $E_{\text{exch}}^{(1)}$ | $E_{\text{ind}}^{(2)}$ | $E_{\text{exch-ind}}^{(2)}$ | $E_{\text{disp}}^{(2)}$ | $E_{\text{exch-disp}}^{(2)}$ | $\delta E_{\text{HF}}$ | $E_{\text{int}}^{\text{SAPT}}$ | $E_{\text{int}}^{\text{MP2}}$ | $E_{\text{int}}^{\text{SCS-MP2}}$ | $E_{\text{int}}^{\text{DFT+Disp}}$ | $E_{\text{int}}^{\text{MP2C}}$ |
|-----|-------------------------|-------------------------|------------------------|-----------------------------|-------------------------|------------------------------|------------------------|--------------------------------|-------------------------------|-----------------------------------|------------------------------------|--------------------------------|
| 0.0 | -4.35                   | 13.17                   | -4.00                  | 4.14                        | -22.11                  | 1.59                         | -0.38                  | -11.95                         | -17.05                        | -11.46                            | -23.41                             | -10.82                         |
| 0.2 | -4.82                   | 14.62                   | -4.51                  | 4.68                        | -23.43                  | 1.96                         | -0.43                  | -11.93                         | -16.64                        | -10.95                            | -                                  | -10.40                         |
| 0.4 | -6.26                   | 19.15                   | -6.94                  | 7.54                        | -24.57                  | 2.27                         | -0.59                  | -9.39                          | -15.11                        | -9.13                             | -21.67                             | -8.53                          |
| 0.6 | -9.25                   | 28.49                   | -9.43                  | 9.82                        | -27.56                  | 2.99                         | -0.94                  | -5.88                          | -11.48                        | -5.01                             | -                                  | -4.49                          |
| 0.8 | -14.90                  | 46.01                   | -15.88                 | 16.48                       | -32.23                  | 4.28                         | -1.66                  | 2.10                           | -3.71                         | 3.48                              | -10.93                             | 3.98                           |
| 1.0 | -25.35                  | 78.10                   | -28.70                 | 29.66                       | -38.60                  | 6.32                         | -3.02                  | 18.41                          | 12.06                         | 20.20                             | -                                  | 20.85                          |
| 1.2 | -44.66                  | 136.52                  | -54.02                 | 55.32                       | -47.81                  | 9.73                         | -5.24                  | 49.85                          | 42.52                         | 51.91                             | 37.68                              | 52.89                          |
| 1.4 | -79.38                  | 239.54                  | -107.33                | 108.43                      | -61.05                  | 15.30                        | -7.87                  | 107.63                         | 98.73                         | 109.78                            | -                                  | 111.35                         |
| 2.0 | -405.03                 | 1157.09                 | -644.51                | 580.51                      | -140.33                 | 55.69                        | -9.82                  | 593.60                         | 155.18                        | 162.30                            | -                                  | -                              |
| 5.0 | -99.72                  | 307.70                  | -145.38                | 144.04                      | -51.50                  | 16.12                        | 44.49                  | 215.75                         | 632.25                        | 652.32                            | -                                  | -                              |
| 6.0 | -5.08                   | 16.13                   | -6.78                  | 7.14                        | -8.64                   | 1.16                         | -0.95                  | 2.98                           | 2.23                          | 3.99                              | -                                  | 3.49                           |
| 7.0 | -0.24                   | 0.74                    | -0.32                  | 0.34                        | -1.60                   | 0.06                         | -0.03                  | -1.05                          | -1.38                         | -0.97                             | -                                  | -1.03                          |
| 8.0 | -0.01                   | 0.03                    | -0.01                  | 0.01                        | -0.42                   | 0.00                         | 0.00                   | -0.40                          | -0.51                         | -0.38                             | -                                  | -0.38                          |
| 9.0 | 0.01                    | 0.00                    | 0.00                   | 0.00                        | -0.15                   | 0.00                         | 0.00                   | -0.14                          | -0.20                         | -0.15                             | -                                  | -0.14                          |

TABLE III: Components of the DFT-SAPT interaction energy for the Ar@C<sub>60</sub> complex. The total DFT-SAPT energy, as well as MP2, SCS-MP2, DFT+Disp, and MP2C interaction energies are also given. Energy values in kJ/mol, distances in Å.

| $r$ | $E_{\text{elst}}^{(1)}$ | $E_{\text{exch}}^{(1)}$ | $E_{\text{ind}}^{(2)}$ | $E_{\text{exch-ind}}^{(2)}$ | $E_{\text{disp}}^{(2)}$ | $E_{\text{exch-disp}}^{(2)}$ | $\delta E_{\text{HF}}$ | $E_{\text{int}}^{\text{SAPT}}$ | $E_{\text{int}}^{\text{MP2}}$ | $E_{\text{int}}^{\text{SCS-MP2}}$ | $E_{\text{int}}^{\text{DFT+Disp}}$ | $E_{\text{int}}^{\text{MP2C}}$ |
|-----|-------------------------|-------------------------|------------------------|-----------------------------|-------------------------|------------------------------|------------------------|--------------------------------|-------------------------------|-----------------------------------|------------------------------------|--------------------------------|
| 0.0 | -29.92                  | 78.51                   | -32.59                 | 31.98                       | -91.95                  | 13.19                        | -2.18                  | -32.97                         | -71.29                        | -45.83                            | -40.69                             | -33.36                         |
| 0.2 | -32.48                  | 85.03                   | -36.16                 | 35.44                       | -93.83                  | 13.85                        | -2.38                  | -30.54                         | -69.25                        | -43.48                            | -                                  | -31.09                         |
| 0.4 | -40.86                  | 106.37                  | -49.17                 | 47.94                       | -99.54                  | 15.90                        | -2.98                  | -22.34                         | -62.16                        | -35.38                            | -29.61                             | -22.12                         |
| 0.6 | -57.41                  | 148.45                  | -73.89                 | 71.52                       | -109.58                 | 19.55                        | -3.87                  | -5.24                          | -46.71                        | -18.23                            | -                                  | -3.75                          |
| 0.8 | -86.92                  | 223.02                  | -122.68                | 117.14                      | -125.33                 | 25.42                        | -4.25                  | 26.41                          | -16.45                        | 14.55                             | -                                  | -                              |
| 1.0 | -137.84                 | 350.37                  | -215.92                | 201.20                      | -147.28                 | 33.95                        | -0.92                  | 83.56                          | 39.83                         | 74.30                             | -                                  | 94.90                          |
| 1.2 | -224.04                 | 562.74                  | -390.15                | 349.57                      | -179.38                 | 46.36                        | 16.18                  | 181.28                         | 140.43                        | 179.55                            | 194.87                             | 205.25                         |
| 1.4 | -367.11                 | 908.66                  | -696.17                | 590.36                      | -221.64                 | 62.12                        | 73.32                  | 349.55                         | 313.14                        | 358.47                            | -                                  | 392.07                         |
| 2.0 | -1485.32                | 3487.40                 | -3465.52               | 2155.45                     | -449.72                 | 131.37                       | 1271.64                | 1645.30                        | 1622.17                       | 1703.53                           | -                                  | -                              |
| 5.0 | -414.34                 | 1099.78                 | -911.44                | 743.46                      | -184.42                 | 56.38                        | 121.75                 | 511.17                         | 516.79                        | 546.91                            | -                                  | -                              |
| 6.0 | -25.17                  | 73.61                   | -44.32                 | 43.22                       | -34.46                  | 6.70                         | -3.00                  | 16.60                          | 10.17                         | 17.84                             | -                                  | 19.03                          |
| 7.0 | -1.21                   | 3.72                    | -1.83                  | 1.81                        | -7.26                   | 0.52                         | -0.18                  | -4.41                          | -6.77                         | -4.74                             | -                                  | -4.51                          |
| 8.0 | -0.05                   | 0.17                    | -0.08                  | 0.08                        | -1.93                   | 0.03                         | -0.02                  | -1.81                          | -2.60                         | -1.98                             | -                                  | -1.81                          |

TABLE IV: Components of the DFT-SAPT interaction energy for the Kr@C<sub>60</sub> complex. The total DFT-SAPT energy, as well as MP2, SCS-MP2, DFT+Disp, and MP2C interaction energies are also given. Energy values in kJ/mol, distances in Å.

| $r$ | $E_{\text{elst}}^{(1)}$ | $E_{\text{exch}}^{(1)}$ | $E_{\text{ind}}^{(2)}$ | $E_{\text{exch-ind}}^{(2)}$ | $E_{\text{disp}}^{(2)}$ | $E_{\text{exch}^{(2)}}$ | $E_{\text{exch-disp}}^{(2)}$ | $\delta E_{\text{HF}}$ | $E_{\text{int}}^{\text{SAPT}}$ | $E_{\text{int}}^{\text{MP2}}$ | $E_{\text{int}}^{\text{SCS-MP2}}$ | $E_{\text{int}}^{\text{DFT+Disp}}$ | $E_{\text{int}}^{\text{MP2C}}$ |
|-----|-------------------------|-------------------------|------------------------|-----------------------------|-------------------------|-------------------------|------------------------------|------------------------|--------------------------------|-------------------------------|-----------------------------------|------------------------------------|--------------------------------|
| 0.0 | -62.41                  | 148.86                  | -86.65                 | 84.46                       | -141.91                 | 25.84                   | -2.75                        | -34.57                 | -91.14                         | -53.99                        | -54.99                            | -34.03                             |                                |
| 0.2 | -67.16                  | 159.93                  | -95.39                 | 92.74                       | -144.14                 | 26.79                   | -2.80                        | -30.04                 | -87.27                         | -49.69                        | -29.51                            |                                    |                                |
| 0.4 | -82.59                  | 195.82                  | -124.63                | 120.21                      | -153.01                 | 30.19                   | -2.69                        | -16.70                 | -74.19                         | -35.31                        | -31.57                            | -14.67                             |                                |
| 0.8 | -165.06                 | 385.69                  | -302.15                | 280.37                      | -188.79                 | 44.97                   | 5.77                         | 60.80                  | 2.72                           | 47.10                         | 62.82                             | -                                  |                                |
| 1.0 | -252.75                 | 584.93                  | -511.79                | 458.37                      | -222.40                 | 58.38                   | 30.06                        | 144.80                 | 91.16                          | 140.01                        | 169.88                            |                                    |                                |
| 1.2 | -396.50                 | 907.48                  | -885.40                | 752.19                      | -263.09                 | 73.76                   | 102.37                       | 290.81                 | 242.40                         | 297.28                        | 311.01                            | 337.43                             |                                |
| 2.0 | -2316.28                | 5032.91                 | -7332.84               | 4037.27                     | -599.65                 | 157.37                  | 3258.89                      | 2237.67                | 2123.01                        | 2241.76                       | -                                 | 608.69                             |                                |
| 5.0 | -676.06                 | 1660.62                 | -1960.32               | 1475.36                     | -257.95                 | 76.48                   | 426.59                       | 744.72                 | 768.47                         | 809.94                        | -                                 | -                                  |                                |
| 6.0 | -45.88                  | 124.99                  | -109.39                | 104.46                      | -50.62                  | 11.24                   | -2.41                        | 32.39                  | 24.40                          | 35.38                         | -                                 | 38.33                              |                                |
| 7.0 | -2.36                   | 6.87                    | -4.48                  | 4.41                        | -10.81                  | 1.00                    | -0.33                        | -5.70                  | -9.46                          | -6.44                         | -                                 | -5.91                              |                                |
| 8.0 | -0.11                   | 0.33                    | -0.19                  | 0.18                        | -2.83                   | 0.06                    | 0.00                         | 0.00                   | -3.88                          | -2.94                         | -                                 | -2.64                              |                                |
| 9.0 | 0.00                    | 0.02                    | -0.01                  | 0.01                        | -0.97                   | 0.00                    | 0.00                         | 0.00                   | -1.49                          | -1.14                         | -                                 | -                                  |                                |
